# Supplementary material for: Physiological maturation and hormonal profiles associated with rooting success of leafy cuttings in Prunus subhirtella 'Autumnalis'
Source: Research Square preprint supplement (doi:10.21203/rs.3.rs-8765137/v1), 2026-02-12
Supplement: Supplementary file 1 [file 30dcf3fa3826866c1b2c12ae.docx]

**SUPPLEMENTARY MATERIAL**

**Fig. S1** Experimental treatments and replication

| **T0**  (21 cuttings) | | | | | **B1**  (21 cuttings) | | | | | **B2**  (21 cuttings) | | | |
| --- | --- | --- | --- | --- | --- | --- | --- | --- | --- | --- | --- | --- | --- |
| 3  7 cuttings | 2  7 cuttings | | 1  7 cuttings | | 1  7 cuttings | 2  7 cuttings | | 3  7 cuttings | | 3  7 cuttings | 2  7 cuttings | | 1  7 cuttings |
| **T30**  (21 cuttings) | | | | | **B24**  (21 cuttings) | | | | | **T4** (21 cuttings) | | | |
| 2  7 cuttings | 3  7 cuttings | | 1  7 cuttings | | 3  7 cuttings | 1  7 cuttings | | 2  7 cuttings | | 3  7 cuttings | 2  7 cuttings | | 1  7 cuttings |
| **B4** (21 cuttings) | | | | | **T1** (21 cuttings) | | | | | **B30** (21 cuttings) | | | |
| 1  7 cuttings | 2  7 cuttings | | 3  7 cuttings | | 3  7 cuttings | 1  7 cuttings | | 2  7 cuttings | | 1  7 cuttings | 3  7 cuttings | | 2  7 cuttings |
| **T2**  (21 cuttings) | | | | | **B0** (21 cuttings) | | | | | **T24** (21 cuttings) | | | |
| 3  7 cuttings | 2  7 cuttings | | 1  7 cuttings | | 1  7 cuttings | 2  7 cuttings | | 3  7 cuttings | | 3  7 cuttings | 1  7 cuttings | | 2  7 cuttings |
| **T Rooting**  24 cuttings | | | | | | | **B rooting** 24 cuttings | | | | | | |
| 1  8 cuttings | | 2  8 cuttings | | 3 8 cuttings | | | 3  8 cuttings | | 2  8 cuttings | | | 1  8 cuttings | |

**Table S1** Percentage of recovery during the extraction of phytohormones in *Prunus subhirtella* ‘Autumnalis’

| Coumpound | % of Recovery (Mean) |
| --- | --- |
| IAA | 80,85 |
| 4-Cl-IAA | 81,00 |
| IBA | 74,64 |
| IAA-Asp | 52,92 |
| IAA-Glu | 59,00 |
| Ox-IAA | 91,70 |
| Ox-IAA-Asp | 44,20 |
| JA | 75,00 |
| JA-Ile | 77,70 |
| Indole-3-acetic acid (IAA), Indole-3-butyric acid (IBA), 4-chloro-indole-3-acetic acid (4-Cl-IAA), Indole-3-acetyl-aspartic acid (IAA-Asp), Indole-3-acetyl-glutamic acid (IAA-Glu), Oxindole-3-acetic acid (ox-IAA), 2-Oxindole-3- acetyl-aspartic acid (ox-IAA-Asp), Jasmonic acid (JA), Jasmonoyl-isoleucine (JA-Ile) | |

**Table S2** Changes in phytohormone content depending on cutting type and time after severance

| **Type of cutting** | **Time after severance** | **IAA** (ng g-1 DW ± SE) | **4-Cl-IAA** (ng g-1 DW ± SE) | **IBA** (ng g-1 DW ± SE) | **IAA-Asp** (ng g-1 DW ± SE) |
| --- | --- | --- | --- | --- | --- |
| **Basal** | **0 min** | 11.39±3.46 c | 438.74±86.79 c | 15.77±6.22 d | 19.85±1.66 a |
| **Basal** | **30 min** | 9.74±1.28 c | 1097.12±244.24 bc | 73.06±2.59 ab | 15.48±5.75 b |
| **Basal** | **1 hour** | 13.20±4.06 c | 2283.73±122.46 ab | 80.68±7.03 a | 33.40±5.92 b |
| **Basal** | **2 hours** | 55.49±12.91 ab | 2553.58±707.82 a | 60.83±3.27 bc | 162.54±15.43 b |
| **Basal** | **4 hours** | 79.93±20.39 a | 2016.07±494.59 ab | 68.97±5.89 abc | 674.29±242.76 b |
| **Basal** | **24 hours** | 26.41±8.08 bc | 0.00±0.00 c | 53.48±1.78 c | 141.38±44.89 b |
| **Terminal** | **0 min** | 16.43±4.75 c | 3562.76±529.14 a | 16.01±5.25 b | 91.86±9.70 a |
| **Terminal** | **30 min** | 26.31±8.97 bc | 1720.19±29.24 b | 82.75±8.61 a | 71.43±15.13 a |
| **Terminal** | **1 hour** | 18.01±4.06 c | 1185.22±115.63 bc | 82.86±11.27 a | 87.19±5.13 b |
| **Terminal** | **2 hours** | 57.49±12.15 ab | 576.48±158.88 cd | 60.50±5.59 a | 338.59±110.41 b |
| **Terminal** | **4 hours** | 61.00±18.28 a | 801.13±88.12 cd | 23.40±12.19 b | 506.16±145.18 b |
| **Terminal** | **24 hours** | 46.03±6.71 abc | 123.25±24.49 d | 7.10±3.55 b | 7.30±7.30 b |
|  |  | **IAA-Glu** (ng g-1 DW ± SE) | **Ox-IAA** (ng g-1 DW ± SE) | **Ox-IAA-Asp** (ng g-1 DW ± SE) |  |
| **Basal** | **0 min** | 78.35±3.69 a | 12.54±0.94 ab | 1.60±0.14 b |  |
| **Basal** | **30 min** | 75.80±3.53 a | 14.44±0.10 a | 2.48±0.24 ab |  |
| **Basal** | **1 hour** | 48.09±15.25 ab | 9.60±0.44 cd | 2.58±1.35 ab |  |
| **Basal** | **2 hours** | 48.69±19.57 ab | 11.34±0.52 bc | 0.93±0.20 b |  |
| **Basal** | **4 hours** | 25.39±4.31 b | 10.70±1.15bc | 1.64±1.13 b |  |
| **Basal** | **24 hours** | 50.66±13.66 ab | 7.87±1.35 d | 4.50±0.45 a |  |
| **Terminal** | **0 min** | 151.99±12.06 a | 23.94±1.24 b | 3.87±0.84 abc |  |
| **Terminal** | **30 min** | 66.15±0.96 b | 86.37±34.72 a | 4.41±0.33 a |  |
| **Terminal** | **1 hour** | 68.19±3.76 b | 74.30±14.39 a | 4.22±0.92 ab |  |
| **Terminal** | **2 hours** | 54.24±0.87 bc | 15.56±0.82 b | 1.51±0.19 c |  |
| **Terminal** | **4 hours** | 43.39±3.24 c | 15.42±2.08 b | 1.81±0.20 bc |  |
| **Terminal** | **24 hours** | 22.52±4.84 d | 15.56±0.59 b | 4.92±1.34 a |  |
|  |  | **JA** (ng g-1 DW ± SE) | **JA-Ile** (ng g-1 DW ± SE) |  |  |
| **Basal** | **0 min** | 289.22±37.97 a | 850.50±149.88 a |  |  |
| **Basal** | **30 min** | 381.12±157.07 a | 530.27±225.26 ab |  |  |
| **Basal** | **1 hour** | 179.59±16.08 a | 130.07±56.82 c |  |  |
| **Basal** | **2 hours** | 200.23±21.52 a | 48.54±12.15 c |  |  |
| **Basal** | **4 hours** | 433.78±119.10 a | 30.75±9.55 c |  |  |
| **Basal** | **24 hours** | 303.24±40.44 a | 366.21±40.76 bc |  |  |
| **Terminal** | **0 min** | 747.98±73.35 a | 465.20±38.51 a |  |  |
| **Terminal** | **30 min** | 148.76±25.21 b | 82.79±11.66 b |  |  |
| **Terminal** | **1 hour** | 195.18±30.06 b | 85.27±23.56 b |  |  |
| **Terminal** | **2 hours** | 197.19±7.93 b | 68.08±51.61 b |  |  |
| **Terminal** | **4 hours** | 167.85±40.43 b | 59.52±14.90 b |  |  |
| **Terminal** | **24 hours** | 240.91±55.22 b | 151.48±100.21 b |  |  |
| Indole-3-acetic acid (IAA), Indole-3-butyric acid (IBA), 4-chloro-indole-3-acetic acid (4-Cl-IAA), Indole-3-acetyl-aspartic acid (IAA-Asp), Indole-3-acetyl-glutamic acid (IAA-Glu), Oxindole-3-acetic acid (ox-IAA), 2-Oxindole-3-acetyl-aspartic acid (ox-IAA-Asp), Jasmonic acid (JA), Jasmonoyl-isoleucine (JA-Ile), (n=3) | | | | | |

The different lowercase letters in the same columns indicate significant difference (p < 0.05), (ANOVA, n=3).

June

**
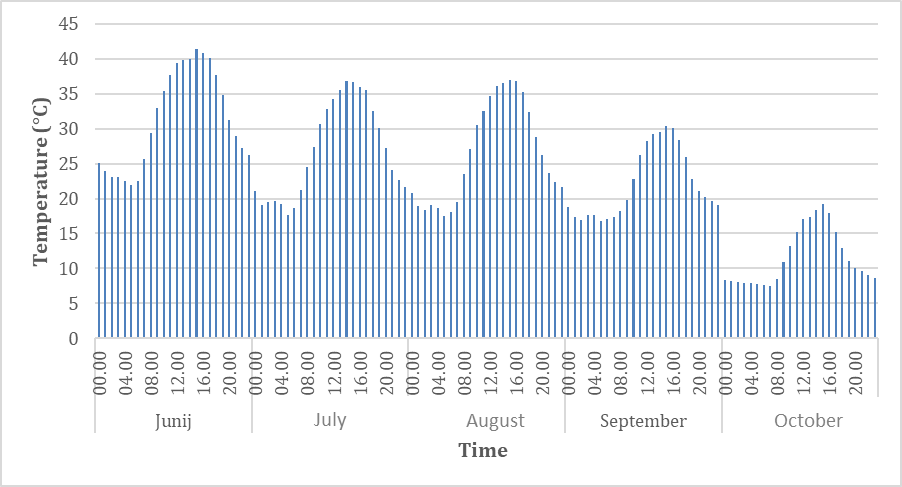
**

**Fig. S2** Average hourly air temperature (° C) measured 3 cm above the leaf lamina during the experimental period


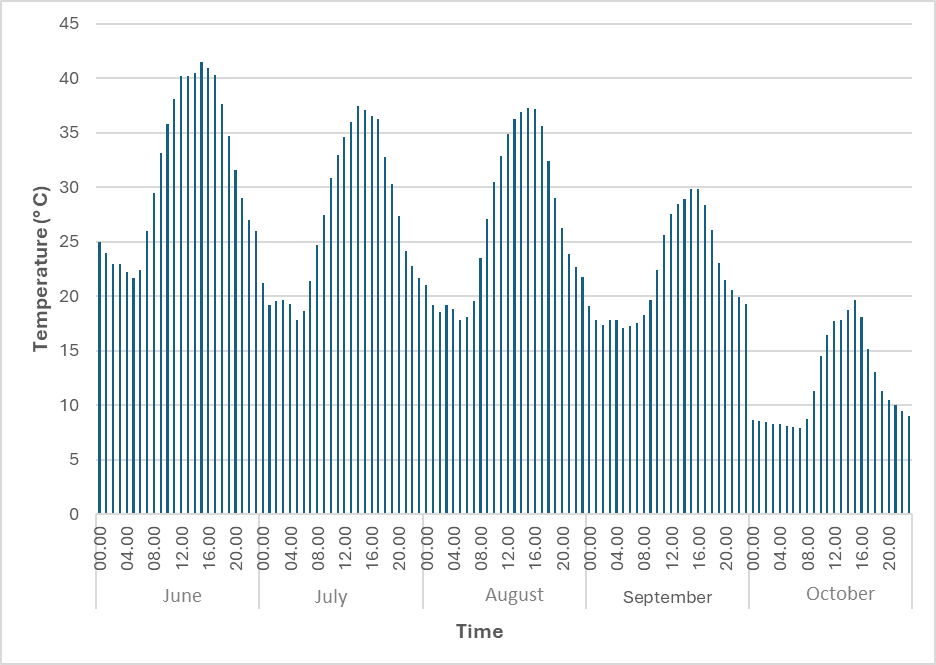


**Fig. S3** Average hourly leaf lamina temperature (° C) measured during the experimental period


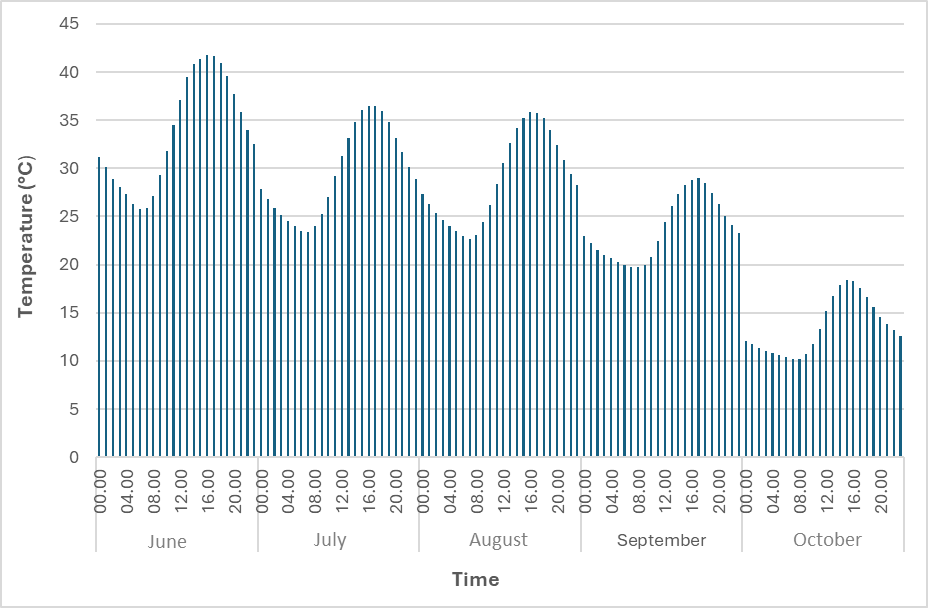


**Fig. S4** Average hourly soil temperature (° C) measured during the experimental period

**Table S3** Rooting success and callus formation in terminal and basal cuttings

| **Type of cutting** | **Successfully rooted cutting** | **Successfully rooted cutting (%)** | **Callus formation in successfully rooted cuttings** | **Callus formation (%) in successfully rooted cuttings** |
| --- | --- | --- | --- | --- |
| **Terminal** | 16/24 | 66,67 | 0/24 | 0 |
| **Basal** | 16/24 | 66,67 | 0/24 | 0 |


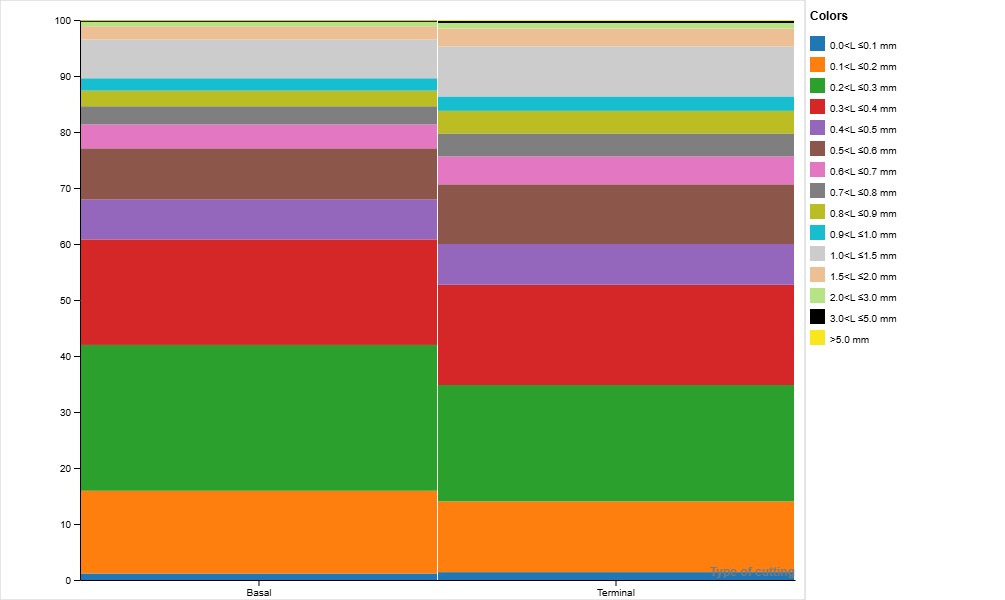


 Root length in each root diameter class (%)

**Fig. S5** Relative distribution of root length across diameter classes according to cutting type
